# Supplementary material for: MiRNAs and piRNAs from bone marrow mesenchymal stem cell extracellular vesicles induce cell survival and inhibit cell differentiation of cord blood hematopoietic stem cells: a new insight in transplantation
Source: PubMed Central journal article supplement (PMC4872742; doi:10.18632/oncotarget.6791), 2015-12-29
Supplement: oncotarget-07-6676-s001.pdf [file oncotarget-07-6676-s001.pdf]

## MiRNAs and piRNAs from bone marrow mesenchymal stem cell extracellular vesicles induce cell survival and inhibit cell differentiation of cord blood hematopoietic stem cells: a new insight in transplantation

### Supplementary Materials

Supplementary Table S1: Mature EVs miRNAs analyzed with small RNA sequencing

| Quartile       | hsa-miR name    | readCount | #uniqueReads | norm_expressed_all | norm_expressed_mapped |
|----------------|-----------------|-----------|--------------|--------------------|-----------------------|
| 1st quartile   | hsa-miR-3168    | 14423     | 65           | 9.04E-01           | 6.30E + 01            |
|                | hsa-miR-22-3p   | 2447      | 22           | 1.53E-01           | 1.07E + 01            |
|                | hsa-miR-378a-3p | 775       | 15           | 4.86E-02           | 3.38E + 00            |
|                | hsa-miR-205-5p  | 523       | 15           | 3.28E-02           | 2.28E + 00            |
|                | hsa-miR-203a    | 515       | 20           | 3.23E-02           | 2.25E + 00            |
|                | hsa-miR-27b-3p  | 458       | 15           | 2.87E-02           | 2.00E + 00            |
|                | hsa-miR-423-5p  | 347       | 14           | 2.17E-02           | 1.52E + 00            |
|                | hsa-miR-21-5p   | 272       | 14           | 1.70E-02           | 1.19E + 00            |
|                | hsa-miR-181a-5p | 231       | 12           | 1.45E-02           | 1.01E + 00            |
|                | hsa-miR-92a-3p  | 221       | 14           | 1.38E-02           | 9.65E - 01            |
|                | hsa-miR-146b-5p | 161       | 10           | 1.01E-02           | 7.03E - 01            |
|                | hsa-miR-10a-5p  | 114       | 7            | 7.14E-03           | 4.98E - 01            |
|                | hsa-miR-26a-5p  | 112       | 6            | 7.02E-03           | 4.89E - 01            |
|                | hsa-miR-148a-3p | 107       | 8            | 6.70E-03           | 4.67E - 01            |
|                | hsa-let-7f-5p   | 102       | 5            | 6.39E-03           | 4.45E - 01            |
|                | hsa-miR-486-5p  | 98        | 10           | 6.14E-03           | 4.28E - 01            |
|                | hsa-miR-28-3p   | 96        | 10           | 6.02E-03           | 4.19E - 01            |
|                | hsa-miR-4792    | 92        | 7            | 5.76E-03           | 4.02E - 01            |
|                | hsa-let-7a-5p   | 84        | 5            | 5.26E-03           | 3.67E - 01            |
|                | hsa-miR-3182    | 83        | 3            | 5.20E-03           | 3.62E - 01            |
| hsa-miR-423-3p | 80              | 6         | 5.01E-03     | 3.49E - 01         |                       |
| 2nd quartile   | hsa-miR-4516    | 70        | 8            | 4.39E-03           | 3.06E - 01            |
|                | hsa-miR-1246    | 69        | 8            | 4.32E-03           | 3.01E - 01            |
|                | hsa-miR-222-3p  | 61        | 4            | 3.82E-03           | 2.66E - 01            |
|                | hsa-miR-320a    | 59        | 11           | 3.70E-03           | 2.58E - 01            |
|                | hsa-let-7i-5p   | 53        | 5            | 3.32E-03           | 2.31E - 01            |
|                | hsa-miR-4301    | 53        | 5            | 3.32E-03           | 2.31E - 01            |
|                | hsa-miR-21-3p   | 50        | 4            | 3.13E-03           | 2.18E - 01            |
|                | hsa-miR-191-5p  | 46        | 5            | 2.88E-03           | 2.01E - 01            |
|                | hsa-let-7b-5p   | 44        | 10           | 2.76E-03           | 1.92E - 01            |
|                | hsa-miR-4448    | 36        | 3            | 2.26E-03           | 1.57E - 01            |
|                | hsa-miR-127-3p  | 35        | 4            | 2.19E-03           | 1.53E - 01            |
|                | hsa-miR-92b-3p  | 33        | 4            | 2.07E-03           | 1.44E - 01            |
|                | hsa-miR-182-5p  | 32        | 5            | 2.01E-03           | 1.40E - 01            |
|                | hsa-miR-1307-5p | 31        | 5            | 1.94E-03           | 1.35E - 01            |
|                | hsa-miR-192-5p  | 27        | 3            | 1.69E-03           | 1.18E - 01            |
|                | hsa-miR-146a-5p | 26        | 4            | 1.63E-03           | 1.14E - 01            |
|                | hsa-miR-210-3p  | 23        | 5            | 1.44E-03           | 1.00E - 01            |
|                | hsa-miR-221-3p  | 23        | 3            | 1.44E-03           | 1.00E - 01            |
|                | hsa-miR-25-3p   | 21        | 1            | 1.32E-03           | 9.17E - 02            |
|                | hsa-miR-4488    | 20        | 5            | 1.25E-03           | 8.73E - 02            |
| hsa-miR-432-5p | 20              | 4         | 1.25E-03     | 8.73E - 02         |                       |
| hsa-miR-30a-5p | 20              | 2         | 1.25E-03     | 8.73E - 02         |                       |

|                 |                   |    |          |          |          |
|-----------------|-------------------|----|----------|----------|----------|
| 3rd quartile    | hsa-miR-769-5p    | 19 | 1        | 1.19E-03 | 8.30E-02 |
|                 | hsa-miR-30e-5p    | 17 | 1        | 1.07E-03 | 7.42E-02 |
|                 | hsa-miR-151a-3p   | 16 | 5        | 1.00E-03 | 6.99E-02 |
|                 | hsa-miR-181b-5p   | 15 | 3        | 9.40E-04 | 6.55E-02 |
|                 | hsa-let-7e-5p     | 15 | 3        | 9.40E-04 | 6.55E-02 |
|                 | hsa-miR-30d-5p    | 14 | 4        | 8.77E-04 | 6.11E-02 |
|                 | hsa-miR-103a-3p   | 14 | 1        | 8.77E-04 | 6.11E-02 |
|                 | hsa-miR-181a-2-3p | 12 | 3        | 7.52E-04 | 5.24E-02 |
|                 | hsa-miR-30c-5p    | 12 | 2        | 7.52E-04 | 5.24E-02 |
|                 | hsa-miR-532-5p    | 12 | 2        | 7.52E-04 | 5.24E-02 |
|                 | hsa-let-7g-5p     | 10 | 3        | 6.27E-04 | 4.37E-02 |
|                 | hsa-miR-142-5p    | 10 | 3        | 6.27E-04 | 4.37E-02 |
|                 | hsa-miR-27a-5p    | 10 | 2        | 6.27E-04 | 4.37E-02 |
|                 | hsa-miR-654-3p    | 10 | 1        | 6.27E-04 | 4.37E-02 |
|                 | hsa-miR-3960      | 9  | 4        | 5.64E-04 | 3.93E-02 |
|                 | hsa-miR-141-3p    | 9  | 2        | 5.64E-04 | 3.93E-02 |
|                 | hsa-miR-27a-3p    | 9  | 2        | 5.64E-04 | 3.93E-02 |
|                 | hsa-miR-223-3p    | 9  | 1        | 5.64E-04 | 3.93E-02 |
|                 | hsa-miR-186-5p    | 8  | 3        | 5.01E-04 | 3.49E-02 |
|                 | hsa-miR-877-5p    | 8  | 3        | 5.01E-04 | 3.49E-02 |
|                 | hsa-miR-3615      | 8  | 2        | 5.01E-04 | 3.49E-02 |
|                 | hsa-miR-27b-5p    | 8  | 1        | 5.01E-04 | 3.49E-02 |
|                 | hsa-miR-4532      | 7  | 2        | 4.39E-04 | 3.06E-02 |
| hsa-miR-26b-5p  | 7                 | 2  | 4.39E-04 | 3.06E-02 |          |
| hsa-miR-125a-5p | 7                 | 1  | 4.39E-04 | 3.06E-02 |          |
| 4th quartile    | hsa-miR-212-3p    | 7  | 1        | 4.39E-04 | 3.06E-02 |
|                 | hsa-miR-125b-1-3p | 6  | 2        | 3.76E-04 | 2.62E-02 |
|                 | hsa-miR-100-5p    | 6  | 2        | 3.76E-04 | 2.62E-02 |
|                 | hsa-miR-150-5p    | 6  | 2        | 3.76E-04 | 2.62E-02 |
|                 | hsa-miR-148b-3p   | 6  | 2        | 3.76E-04 | 2.62E-02 |
|                 | hsa-miR-339-3p    | 6  | 2        | 3.76E-04 | 2.62E-02 |
|                 | hsa-miR-93-3p     | 6  | 1        | 3.76E-04 | 2.62E-02 |
|                 | hsa-miR-212-5p    | 6  | 1        | 3.76E-04 | 2.62E-02 |
|                 | hsa-miR-1468-5p   | 6  | 1        | 3.76E-04 | 2.62E-02 |
|                 | hsa-miR-574-5p    | 6  | 1        | 3.76E-04 | 2.62E-02 |
|                 | hsa-miR-7641      | 5  | 2        | 3.13E-04 | 2.18E-02 |
|                 | hsa-miR-31-5p     | 5  | 2        | 3.13E-04 | 2.18E-02 |
|                 | hsa-miR-345-5p    | 5  | 2        | 3.13E-04 | 2.18E-02 |
|                 | hsa-miR-16-5p     | 5  | 2        | 3.13E-04 | 2.18E-02 |
|                 | hsa-miR-101-3p    | 5  | 2        | 3.13E-04 | 2.18E-02 |
|                 | hsa-miR-130a-3p   | 5  | 1        | 3.13E-04 | 2.18E-02 |
|                 | hsa-miR-205-3p    | 5  | 1        | 3.13E-04 | 2.18E-02 |
|                 | hsa-miR-193b-5p   | 5  | 1        | 3.13E-04 | 2.18E-02 |
|                 | hsa-miR-5096      | 5  | 1        | 3.13E-04 | 2.18E-02 |

**Supplementary Table S2: Differentially expressed genes in UCB-CD34+ treated with EVs vs control ( $p$ -value < 0.05, logFC = 0.7)**

| ID Entrez | Symbol   | Entrez Gene Name                                                                      | Log Ratio |
|-----------|----------|---------------------------------------------------------------------------------------|-----------|
| 3569      | IL6      | interleukin 6                                                                         | 4.396     |
| 6346      | CCL1     | chemokine (C-C motif) ligand 1                                                        | 3.456     |
| 1437      | CSF2     | colony stimulating factor 2 (granulocyte-macrophage)                                  | 3.151     |
| 10563     | CXCL13   | chemokine (C-X-C motif) ligand 13                                                     | 3.086     |
| 10148     | EBI3     | Epstein-Barr virus induced 3                                                          | 2.884     |
| 5743      | PTGS2    | prostaglandin-endoperoxide synthase 2 (prostaglandin G/H synthase and cyclooxygenase) | 2.696     |
| 6363      | CCL19    | chemokine (C-C motif) ligand 19                                                       | 2.66      |
| 56300     | IL36G    | interleukin 36, gamma                                                                 | 2.541     |
| 6364      | CCL20    | chemokine (C-C motif) ligand 20                                                       | 2.144     |
| 6349      | CCL3L1   | chemokine (C-C motif) ligand 3-like 1                                                 | 2.124     |
| 83862     | TMEM120A | transmembrane protein 120A                                                            | 2.065     |
| 6348      | CCL3     | chemokine (C-C motif) ligand 3                                                        | 2.034     |
| 10537     | UBD      | ubiquitin D                                                                           | 1.953     |
| 6372      | CXCL6    | chemokine (C-X-C motif) ligand 6                                                      | 1.941     |
| 3553      | IL1B     | interleukin 1, beta                                                                   | 1.933     |
| 3627      | CXCL10   | chemokine (C-X-C motif) ligand 10                                                     | 1.877     |
| 3488      | IGFBP5   | insulin-like growth factor binding protein 5                                          | 1.876     |
| 2920      | CXCL2    | chemokine (C-X-C motif) ligand 2                                                      | 1.821     |
| 9536      | PTGES    | prostaglandin E synthase                                                              | 1.778     |
| 3620      | IDO1     | indoleamine 2,3-dioxygenase 1                                                         | 1.656     |
| 3779      | KCNMB1   | potassium large conductance calcium-activated channel, subfamily M, beta member 1     | 1.624     |
| 7130      | TNFAIP6  | tumor necrosis factor, alpha-induced protein 6                                        | 1.61      |
| 3552      | IL1A     | interleukin 1, alpha                                                                  | 1.584     |
| 4502      | MT2A     | metallothionein 2A                                                                    | 1.572     |
| 6648      | SOD2     | superoxide dismutase 2, mitochondrial                                                 | 1.547     |
| 2919      | CXCL1    | chemokine (C-X-C motif) ligand 1                                                      | 1.45      |
| 57817     | HAMP     | hepcidin antimicrobial peptide                                                        | 1.426     |
| 4495      | MT1G     | metallothionein 1G                                                                    | 1.424     |
| 8710      | SERPINB7 | serpin peptidase inhibitor, clade B (ovalbumin), member 7                             | 1.416     |
| 4489      | MT1A     | metallothionein 1A                                                                    | 1.407     |
| 114614    | MIR155HG | MIR155 host gene (non-protein coding)                                                 | 1.394     |
| 11009     | IL24     | interleukin 24                                                                        | 1.389     |
| 5327      | PLAT     | plasminogen activator, tissue                                                         | 1.387     |
| 2633      | GBP1     | guanylate binding protein 1, interferon-inducible                                     | 1.348     |
| 1236      | CCR7     | chemokine (C-C motif) receptor 7                                                      | 1.279     |
| 6775      | STAT4    | signal transducer and activator of transcription 4                                    | 1.279     |
| 4790      | NFKB1    | nuclear factor of kappa light polypeptide gene enhancer in B-cells 1                  | 1.277     |
| 6890      | TAP1     | transporter 1, ATP-binding cassette, sub-family B (MDR/TAP)                           | 1.236     |

|               |                   |                                                                                                     |       |
|---------------|-------------------|-----------------------------------------------------------------------------------------------------|-------|
| <b>3669</b>   | ISG20             | interferon stimulated exonuclease gene 20kDa                                                        | 1.235 |
| <b>1462</b>   | VCAN              | versican                                                                                            | 1.226 |
| <b>22846</b>  | VASH1             | vasohibin 1                                                                                         | 1.219 |
| <b>94235</b>  | GNG8              | guanine nucleotide binding protein (G protein), gamma 8                                             | 1.211 |
| <b>5996</b>   | RGS1              | regulator of G-protein signaling 1                                                                  | 1.194 |
| <b>5553</b>   | PRG2              | proteoglycan 2, bone marrow (natural killer cell activator, eosinophil granule major basic protein) | 1.186 |
| <b>8809</b>   | IL18R1            | interleukin 18 receptor 1                                                                           | 1.185 |
| <b>6367</b>   | CCL22             | chemokine (C-C motif) ligand 22                                                                     | 1.181 |
| <b>114897</b> | C1QTNF1           | C1q and tumor necrosis factor related protein 1                                                     | 1.149 |
| <b>8743</b>   | TNFSF10           | tumor necrosis factor (ligand) superfamily, member 10                                               | 1.144 |
| <b>9662</b>   | CEP135            | centrosomal protein 135kDa                                                                          | 1.131 |
| <b>5366</b>   | PMAIP1            | phorbol-12-myristate-13-acetate-induced protein 1                                                   | 1.107 |
| <b>145864</b> | HAPLN3            | hyaluronan and proteoglycan link protein 3                                                          | 1.1   |
| <b>9367</b>   | RAB9A             | RAB9A, member RAS oncogene family                                                                   | 1.07  |
| <b>4499</b>   | MT1M              | metallothionein 1M                                                                                  | 1.067 |
| <b>64092</b>  | SAMSN1            | SAM domain, SH3 domain and nuclear localization signals 1                                           | 1.065 |
| <b>7292</b>   | TNFSF4            | tumor necrosis factor (ligand) superfamily, member 4                                                | 1.065 |
| <b>11001</b>  | SLC27A2           | solute carrier family 27 (fatty acid transporter), member 2                                         | 1.053 |
| <b>115361</b> | GBP4              | guanylate binding protein 4                                                                         | 1.033 |
| <b>8870</b>   | IER3              | immediate early response 3                                                                          | 1.029 |
| <b>23180</b>  | RFTN1             | raftlin, lipid raft linker 1                                                                        | 1.022 |
| <b>3429</b>   | IFI27             | interferon, alpha-inducible protein 27                                                              | 1.021 |
| <b>3559</b>   | IL2RA             | interleukin 2 receptor, alpha                                                                       | 1.016 |
| <b>57801</b>  | HES4              | hes family bHLH transcription factor 4                                                              | 1.015 |
| <b>7453</b>   | WARS              | tryptophanyl-tRNA synthetase                                                                        | 0.993 |
| <b>3589</b>   | IL11              | interleukin 11                                                                                      | 0.989 |
| <b>135</b>    | ADORA2A           | adenosine A2a receptor                                                                              | 0.983 |
| <b>2532</b>   | ACKR1             | atypical chemokine receptor 1 (Duffy blood group)                                                   | 0.971 |
| <b>10135</b>  | NAMPT             | nicotinamide phosphoribosyltransferase                                                              | 0.97  |
| <b>10538</b>  | BATF              | basic leucine zipper transcription factor, ATF-like                                                 | 0.967 |
| <b>11040</b>  | PIM2              | Pim-2 proto-oncogene, serine/threonine kinase                                                       | 0.96  |
| <b>6624</b>   | FSCN1             | fascin actin-bundling protein 1                                                                     | 0.956 |
| <b>4885</b>   | NPTX2             | neuronal pentraxin II                                                                               | 0.953 |
| <b>51312</b>  | SLC25A37          | solute carrier family 25 (mitochondrial iron transporter), member 37                                | 0.952 |
| <b>56265</b>  | CPXM1             | carboxypeptidase X (M14 family), member 1                                                           | 0.951 |
| <b>115362</b> | GBP5              | guanylate binding protein 5                                                                         | 0.947 |
| <b>388372</b> | CCL4L1/<br>CCL4L2 | chemokine (C-C motif) ligand 4-like 1                                                               | 0.931 |
| <b>3456</b>   | IFNB1             | interferon, beta 1, fibroblast                                                                      | 0.93  |
| <b>11274</b>  | USP18             | ubiquitin specific peptidase 18                                                                     | 0.93  |
| <b>9173</b>   | IL1RL1            | interleukin 1 receptor-like 1                                                                       | 0.927 |
| <b>9638</b>   | FEZ1              | fasciculation and elongation protein zeta 1 (zygin I)                                               | 0.926 |
| <b>51561</b>  | IL23A             | interleukin 23, alpha subunit p19                                                                   | 0.923 |

|        |          |                                                                                                                  |       |
|--------|----------|------------------------------------------------------------------------------------------------------------------|-------|
| 306    | ANXA3    | annexin A3                                                                                                       | 0.909 |
| 2706   | GJB2     | gap junction protein, beta 2, 26kDa                                                                              | 0.908 |
| 9242   | MSC      | musculin                                                                                                         | 0.9   |
| 7295   | TXN      | thioredoxin                                                                                                      | 0.897 |
| 8140   | SLC7A5   | solute carrier family 7 (amino acid transporter light chain, L system), member 5                                 | 0.895 |
| 8738   | CRADD    | CASP2 and RIPK1 domain containing adaptor with death domain                                                      | 0.891 |
| 10409  | BASP1    | brain abundant, membrane attached signal protein 1                                                               | 0.881 |
| 64218  | SEMA4A   | sema domain, immunoglobulin domain (Ig), transmembrane domain (TM) and short cytoplasmic domain, (semaphorin) 4A | 0.879 |
| 57007  | ACKR3    | atypical chemokine receptor 3                                                                                    | 0.869 |
| 139411 | PTCHD1   | patched domain containing 1                                                                                      | 0.862 |
| 4791   | NFKB2    | nuclear factor of kappa light polypeptide gene enhancer in B-cells 2 (p49/p100)                                  | 0.856 |
| 11182  | SLC2A6   | solute carrier family 2 (facilitated glucose transporter), member 6                                              | 0.855 |
| 5209   | PFKFB3   | 6-phosphofructo-2-kinase/fructose-2,6-biphosphatase 3                                                            | 0.843 |
| 4049   | LTA      | lymphotoxin alpha                                                                                                | 0.829 |
| 4001   | LMNB1    | lamin B1                                                                                                         | 0.818 |
| 23413  | NCS1     | neuronal calcium sensor 1                                                                                        | 0.818 |
| 5008   | OSM      | oncostatin M                                                                                                     | 0.814 |
| 890    | CCNA2    | cyclin A2                                                                                                        | 0.801 |
| 3576   | CXCL8    | chemokine (C-X-C motif) ligand 8                                                                                 | 0.8   |
| 375449 | MAST4    | microtubule associated serine/threonine kinase family member 4                                                   | 0.792 |
| 83641  | FAM107B  | family with sequence similarity 107, member B                                                                    | 0.792 |
| 23753  | SDF2L1   | stromal cell-derived factor 2-like 1                                                                             | 0.787 |
| 3604   | TNFRSF9  | tumor necrosis factor receptor superfamily, member 9                                                             | 0.787 |
| 10938  | EHD1     | EH-domain containing 1                                                                                           | 0.784 |
| 127544 | RNF19B   | ring finger protein 19B                                                                                          | 0.774 |
| 970    | CD70     | CD70 molecule                                                                                                    | 0.765 |
| 644314 | MT1IP    | metallothionein 1I, pseudogene                                                                                   | 0.764 |
| 1847   | DUSP5    | dual specificity phosphatase 5                                                                                   | 0.762 |
| 55848  | PLGRKT   | plasminogen receptor, C-terminal lysine transmembrane protein                                                    | 0.762 |
| 135112 | NCOA7    | nuclear receptor coactivator 7                                                                                   | 0.761 |
| 9833   | MELK     | maternal embryonic leucine zipper kinase                                                                         | 0.759 |
| 10410  | IFITM3   | interferon induced transmembrane protein 3                                                                       | 0.754 |
| 6373   | CXCL11   | chemokine (C-X-C motif) ligand 11                                                                                | 0.754 |
| 22875  | ENPP4    | ectonucleotide pyrophosphatase/phosphodiesterase 4 (putative)                                                    | 0.752 |
| 29957  | SLC25A24 | solute carrier family 25 (mitochondrial carrier; phosphate carrier), member 24                                   | 0.751 |
| 654    | BMP6     | bone morphogenetic protein 6                                                                                     | 0.739 |
| 51316  | PLAC8    | placenta-specific 8                                                                                              | 0.739 |
| 8651   | SOCS1    | suppressor of cytokine signaling 1                                                                               | 0.737 |
| 9595   | CYTIP    | cytohesin 1 interacting protein                                                                                  | 0.734 |
| 7128   | TNFAIP3  | tumor necrosis factor, alpha-induced protein 3                                                                   | 0.734 |
| 2117   | ETV3     | ets variant 3                                                                                                    | 0.728 |
| 4494   | MT1F     | metallothionein 1F                                                                                               | 0.724 |

|               |                     |                                                                              |        |
|---------------|---------------------|------------------------------------------------------------------------------|--------|
| <b>25805</b>  | BAMBI               | BMP and activin membrane-bound inhibitor                                     | 0.723  |
| <b>4091</b>   | SMAD6               | SMAD family member 6                                                         | 0.716  |
| <b>8544</b>   | PIR                 | pirin (iron-binding nuclear protein)                                         | 0.713  |
| <b>952</b>    | CD38                | CD38 molecule                                                                | 0.707  |
| <b>4312</b>   | MMP1                | matrix metalloproteinase 1 (interstitial collagenase)                        | 0.703  |
| <b>5698</b>   | PSMB9               | proteasome (prosome, macropain) subunit, beta type, 9                        | 0.703  |
| <b>4493</b>   | MT1E                | metallothionein 1E                                                           | 0.701  |
| <b>64108</b>  | RTP4                | receptor (chemosensory) transporter protein 4                                | 0.7    |
| <b>56603</b>  | CYP26B1             | cytochrome P450, family 26, subfamily B, polypeptide 1                       | -0.701 |
| <b>9920</b>   | KBTBD11             | kelch repeat and BTB (POZ) domain containing 11                              | -0.702 |
| <b>55357</b>  | TBC1D2              | TBC1 domain family, member 2                                                 | -0.708 |
| <b>30061</b>  | SLC40A1             | solute carrier family 40 (iron-regulated transporter), member 1              | -0.711 |
| <b>23643</b>  | LY96                | lymphocyte antigen 96                                                        | -0.712 |
| <b>8854</b>   | ALDH1A2             | aldehyde dehydrogenase 1 family, member A2                                   | -0.712 |
| <b>166012</b> | CHST13              | carbohydrate (chondroitin 4) sulfotransferase 13                             | -0.717 |
| <b>284422</b> | SMIM24              | small integral membrane protein 24                                           | -0.721 |
| <b>440712</b> | C1orf186            | chromosome 1 open reading frame 186                                          | -0.722 |
| <b>3490</b>   | IGFBP7              | insulin-like growth factor binding protein 7                                 | -0.724 |
| <b>23646</b>  | PLD3                | phospholipase D family, member 3                                             | -0.725 |
| <b>4048</b>   | LTA4H               | leukotriene A4 hydrolase                                                     | -0.735 |
| <b>2354</b>   | FOSB                | FBJ murine osteosarcoma viral oncogene homolog B                             | -0.737 |
| <b>2208</b>   | FCER2               | Fc fragment of IgE, low affinity II, receptor for (CD23)                     | -0.74  |
| <b>6037</b>   | RNASE3              | ribonuclease, RNase A family, 3                                              | -0.742 |
| <b>222166</b> | MTURN               | maturin, neural progenitor differentiation regulator homolog (Xenopus)       | -0.742 |
| <b>1848</b>   | DUSP6               | dual specificity phosphatase 6                                               | -0.743 |
| <b>11098</b>  | PRSS23              | protease, serine, 23                                                         | -0.745 |
| <b>1393</b>   | CRHBP               | corticotropin releasing hormone binding protein                              | -0.747 |
| <b>847</b>    | CAT                 | catalase                                                                     | -0.752 |
| <b>10870</b>  | HCST                | hematopoietic cell signal transducer                                         | -0.758 |
| <b>442582</b> | STAG3L2/<br>STAG3L3 | stromal antigen 3-like 3                                                     | -0.758 |
| <b>1027</b>   | CDKN1B              | cyclin-dependent kinase inhibitor 1B (p27, Kip1)                             | -0.764 |
| <b>51738</b>  | GHRL                | ghrelin/obestatin prepropeptide                                              | -0.766 |
| <b>11010</b>  | GLIPR1              | GLI pathogenesis-related 1                                                   | -0.77  |
| <b>56833</b>  | SLAMF8              | SLAM family member 8                                                         | -0.771 |
| <b>6036</b>   | RNASE2              | ribonuclease, RNase A family, 2 (liver, eosinophil-derived neurotoxin)       | -0.775 |
| <b>645638</b> | WFDC21P             | WAP four-disulfide core domain 21, pseudogene                                | -0.779 |
| <b>81501</b>  | DCSTAMP             | dendrocyte expressed seven transmembrane protein                             | -0.779 |
| <b>3202</b>   | HOXA5               | homeobox A5                                                                  | -0.788 |
| <b>3045</b>   | HBD                 | hemoglobin, delta                                                            | -0.788 |
| <b>5997</b>   | RGS2                | regulator of G-protein signaling 2                                           | -0.788 |
| <b>10365</b>  | KLF2                | Kruppel-like factor 2                                                        | -0.79  |
| <b>6518</b>   | SLC2A5              | solute carrier family 2 (facilitated glucose/fructose transporter), member 5 | -0.794 |

|               |           |                                                                                  |        |
|---------------|-----------|----------------------------------------------------------------------------------|--------|
| <b>6503</b>   | SLA       | Src-like-adaptor                                                                 | -0.802 |
| <b>284</b>    | ANGPT1    | angiopoietin 1                                                                   | -0.802 |
| <b>10184</b>  | LHFPL2    | lipoma HMGIC fusion partner-like 2                                               | -0.806 |
| <b>84803</b>  | AGPAT9    | 1-acylglycerol-3-phosphate O-acyltransferase 9                                   | -0.81  |
| <b>10261</b>  | IGSF6     | immunoglobulin superfamily, member 6                                             | -0.817 |
| <b>6281</b>   | S100A10   | S100 calcium binding protein A10                                                 | -0.818 |
| <b>6386</b>   | SDCBP     | syndecan binding protein (syntenin)                                              | -0.82  |
| <b>1992</b>   | SERPINB1  | serpin peptidase inhibitor, clade B (ovalbumin), member 1                        | -0.823 |
| <b>137075</b> | CLDN23    | claudin 23                                                                       | -0.839 |
| <b>2745</b>   | GLRX      | glutaredoxin (thioltransferase)                                                  | -0.84  |
| <b>79026</b>  | AHNAK     | AHNAK nucleoprotein                                                              | -0.843 |
| <b>4071</b>   | TM4SF1    | transmembrane 4 L six family member 1                                            | -0.867 |
| <b>1991</b>   | ELANE     | elastase, neutrophil expressed                                                   | -0.869 |
| <b>23601</b>  | CLEC5A    | C-type lectin domain family 5, member A                                          | -0.872 |
| <b>9332</b>   | CD163     | CD163 molecule                                                                   | -0.878 |
| <b>2359</b>   | FPR3      | formyl peptide receptor 3                                                        | -0.884 |
| <b>3205</b>   | HOXA9     | homeobox A9                                                                      | -0.889 |
| <b>9834</b>   | KIAA0125  | KIAA0125                                                                         | -0.89  |
| <b>4613</b>   | MYCN      | v-myc avian myelocytomatosis viral oncogene neuroblastoma derived homolog        | -0.894 |
| <b>64798</b>  | DEPTOR    | DEP domain containing MTOR-interacting protein                                   | -0.899 |
| <b>8334</b>   | HIST1H2AC | histone cluster 1, H2ac                                                          | -0.899 |
| <b>10577</b>  | NPC2      | Niemann-Pick disease, type C2                                                    | -0.9   |
| <b>123</b>    | PLIN2     | perilipin 2                                                                      | -0.926 |
| <b>2205</b>   | FCER1A    | Fc fragment of IgE, high affinity I, receptor for; alpha polypeptide             | -0.929 |
| <b>2124</b>   | EVI2B     | ecotropic viral integration site 2B                                              | -0.947 |
| <b>1230</b>   | CCR1      | chemokine (C-C motif) receptor 1                                                 | -0.971 |
| <b>10437</b>  | IFI30     | interferon, gamma-inducible protein 30                                           | -0.994 |
| <b>10077</b>  | TSPAN32   | tetraspanin 32                                                                   | -1.001 |
| <b>3988</b>   | LIPA      | lipase A, lysosomal acid, cholesterol esterase                                   | -1.022 |
| <b>7305</b>   | TYROBP    | TYRO protein tyrosine kinase binding protein                                     | -1.025 |
| <b>55803</b>  | ADAP2     | ArfGAP with dual PH domains 2                                                    | -1.03  |
| <b>2268</b>   | FGR       | FGR proto-oncogene, Src family tyrosine kinase                                   | -1.042 |
| <b>7941</b>   | PLA2G7    | phospholipase A2, group VII (platelet-activating factor acetylhydrolase, plasma) | -1.072 |
| <b>678</b>    | ZFP36L2   | ZFP36 ring finger protein-like 2                                                 | -1.072 |
| <b>27128</b>  | CYTH4     | cytohesin 4                                                                      | -1.075 |
| <b>11027</b>  | LILRA2    | leukocyte immunoglobulin-like receptor, subfamily A (with TM domain), member 2   | -1.075 |
| <b>4973</b>   | OLR1      | oxidized low density lipoprotein (lectin-like) receptor 1                        | -1.082 |
| <b>54360</b>  | CYTL1     | cytokine-like 1                                                                  | -1.115 |
| <b>1178</b>   | CLC       | Charcot-Leyden crystal galectin                                                  | -1.144 |
| <b>10457</b>  | GPNMB     | glycoprotein (transmembrane) nmb                                                 | -1.179 |
| <b>1050</b>   | CEBPA     | CCAAT/enhancer binding protein (C/EBP), alpha                                    | -1.182 |
| <b>255631</b> | COL24A1   | collagen, type XXIV, alpha 1                                                     | -1.23  |



|        |         |                                                                                        |        |
|--------|---------|----------------------------------------------------------------------------------------|--------|
| 1593   | CYP27A1 | cytochrome P450, family 27, subfamily A, polypeptide 1                                 | -1.241 |
| 6446   | SGK1    | serum/glucocorticoid regulated kinase 1                                                | -1.272 |
| 1536   | CYBB    | cytochrome b-245, beta polypeptide                                                     | -1.302 |
| 199675 | MCEMP1  | mast cell-expressed membrane protein 1                                                 | -1.308 |
| 4352   | MPL     | MPL proto-oncogene, thrombopoietin receptor                                            | -1.329 |
| 301    | ANXA1   | annexin A1                                                                             | -1.391 |
| 25907  | TMEM158 | transmembrane protein 158 (gene/pseudogene)                                            | -1.393 |
| 7045   | TGFBI   | transforming growth factor, beta-induced, 68kDa                                        | -1.397 |
| 6691   | SPINK2  | serine peptidase inhibitor, Kazal type 2                                               | -1.434 |
| 1545   | CYP1B1  | cytochrome P450, family 1, subfamily B, polypeptide 1                                  | -1.448 |
| 54     | ACP5    | acid phosphatase 5, tartrate resistant                                                 | -1.492 |
| 4318   | MMP9    | matrix metalloproteinase 9 (gelatinase B, 92kDa gelatinase, 92kDa type IV collagenase) | -1.518 |
| 1436   | CSF1R   | colony stimulating factor 1 receptor                                                   | -1.55  |
| 28984  | RGCC    | regulator of cell cycle                                                                | -1.634 |
| 1514   | CTSL    | cathepsin L                                                                            | -1.657 |
| 2012   | EMP1    | epithelial membrane protein 1                                                          | -1.669 |
| 1043   | CD52    | CD52 molecule                                                                          | -1.747 |
| 1959   | EGR2    | early growth response 2                                                                | -1.8   |
| 4353   | MPO     | myeloperoxidase                                                                        | -2.024 |
| 4069   | LYZ     | lysozyme                                                                               | -2.071 |
| 6354   | CCL7    | chemokine (C-C motif) ligand 7                                                         | -2.085 |
| 5473   | PPBP    | pro-platelet basic protein                                                             | -2.468 |
| 2203   | FBP1    | fructose-1,6-bisphosphatase 1                                                          | -2.989 |
| 6369   | CCL24   | chemokine (C-C motif) ligand 24                                                        | -3.003 |

**Supplementary Table S3: Correlation of sequenced EVs piRNAs and down-regulated target genes in UCB-Cd34+ treated with BM-MSC-EVs ( $p$ -value < 0.05, logFC = -0.4)**

| miRNA                   |                  | Regulated genes                                                                                                                                        |
|-------------------------|------------------|--------------------------------------------------------------------------------------------------------------------------------------------------------|
| <i>Name</i>             | <i>readCount</i> | <i>Symbol (Entrez Gene ID)</i>                                                                                                                         |
| hsa_piR_004307_DQ575881 | 2965.67          | FES (2242)                                                                                                                                             |
| hsa_piR_017723_DQ594464 | 643.333          | FOS (2353), HNRNPA0 (10949), RABGAP1 (23637)                                                                                                           |
| hsa_piR_020814_DQ598650 | 13               | CDK6 (1021), HBG2 (3048), MAP3K1 (4214), MPO (4353), RYR3 (6263), SLAMF8 (56833), SLC2A5 (6518), SOX4 (6659), STOM (2040), TPPI1 (1200), YPEL5 (51646) |
| hsa_piR_016745_DQ593052 | 11.6667          | ANKRD28 (23243)                                                                                                                                        |
| hsa_piR_002732_DQ573682 | 6                | CYP1B1 (1545), USP3 (1545)                                                                                                                             |



**Supplementary Table S4: Molecular and cellular functions of down-regulated piRNAs targeted genes ( $p$ -value < 0.05, logFC = -0.4)**

| Gene Ontology Bio Functions              | $p$ -value                  |
|------------------------------------------|-----------------------------|
| <i>Molecular and Cellular Functions</i>  |                             |
| <b>Cell Morphology</b>                   | $3.28^{-02}$ – $3.54^{-05}$ |
| <b>Cellular Compromise</b>               | $2.95^{-02}$ – $4.35^{-04}$ |
| <b>Cell Death and Survival</b>           | $3.12^{-02}$ – $4.85^{-04}$ |
| <b>Cellular Development</b>              | $3.12^{-02}$ – $5.01^{-04}$ |
| <b>Cellular Growth and Proliferation</b> | $2.95^{-02}$ – $5.01^{-04}$ |
